# Supplementary material for: Innovative spectrofluorimetric determination of vildagliptin based on a “switch off/on” NS-doped carbon dot nanosensor
Source: Royal Society of Chemistry journal article supplement (doi:10.1039/d2ra04991k), 2022-01-01
Supplement: d2ra04991k1.pdf [file d2ra04991k1.pdf]

## Supplementary Information

### **Innovative Spectrofluorimetric Determination of Vildagliptin Based on "Switch Off/On" NS- doped Carbon Dots Nanosensor**

**Eman A. Elshenawy<sup>a\*</sup>, Samah F. El-Malla<sup>a</sup>, Sherin F. Hammad<sup>a</sup> & Fotouh R. Mansour<sup>a</sup>**

<sup>a</sup> Department of Pharmaceutical Analytical Chemistry, Faculty of Pharmacy, Tanta  
University, Tanta, 31111, Egypt.

\* Correspondence to [eman.elshenawy@pharm.tanta.edu.eg](mailto:eman.elshenawy@pharm.tanta.edu.eg)

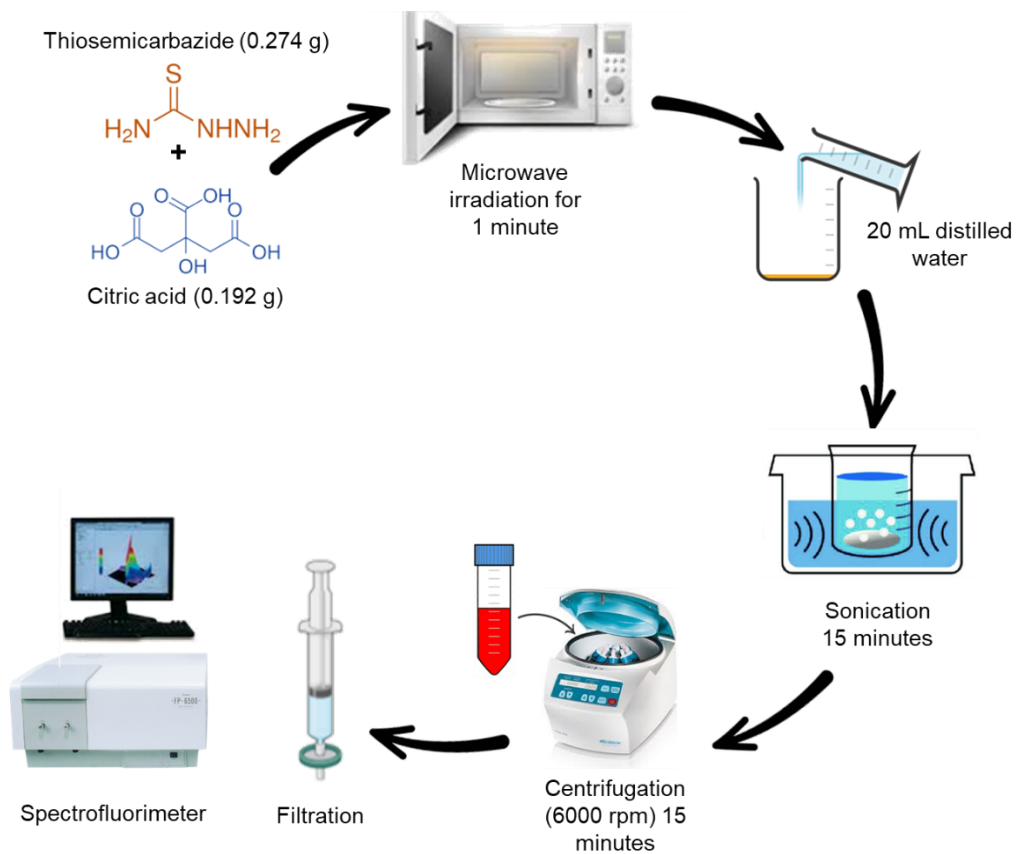

**Scheme S1.** Illustration of NS-CDs Synthesis

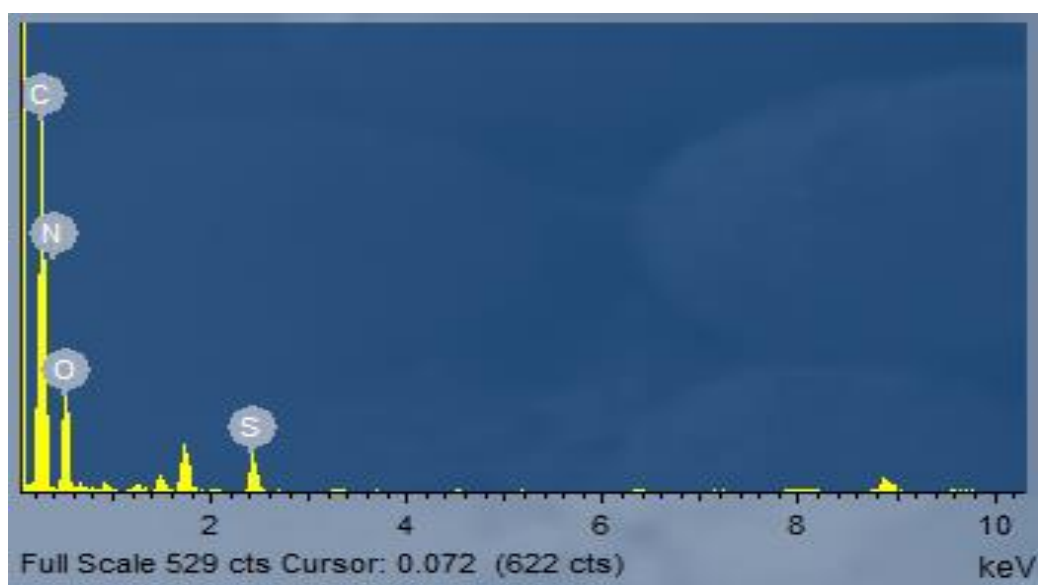

**Fig. S1:** TEM-EDX elemental analysis of the prepared NS-CDs.

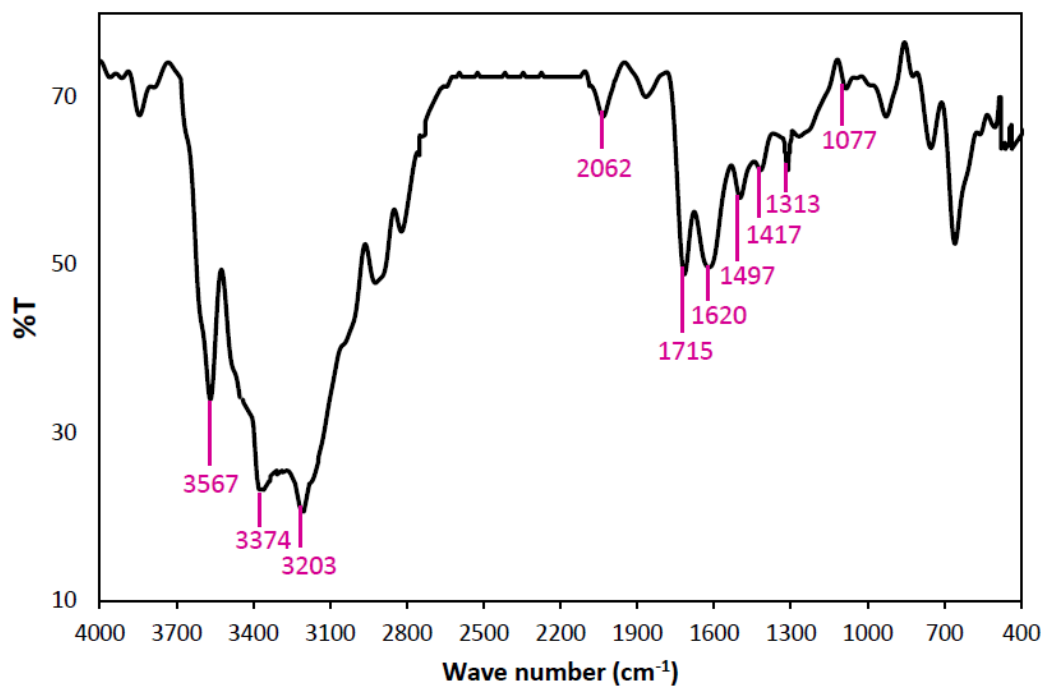

**Fig. S2:** IR spectrum showing the surface functional groups of the prepared NS-CDs.

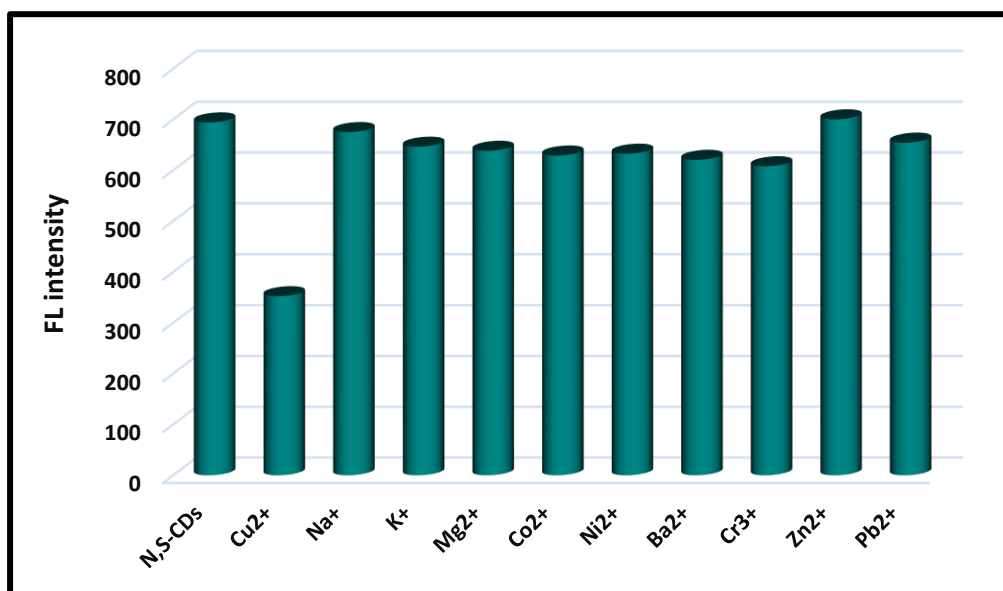

**Fig. S3** Quenching performance of various cations (100 μM) on NS-CDs

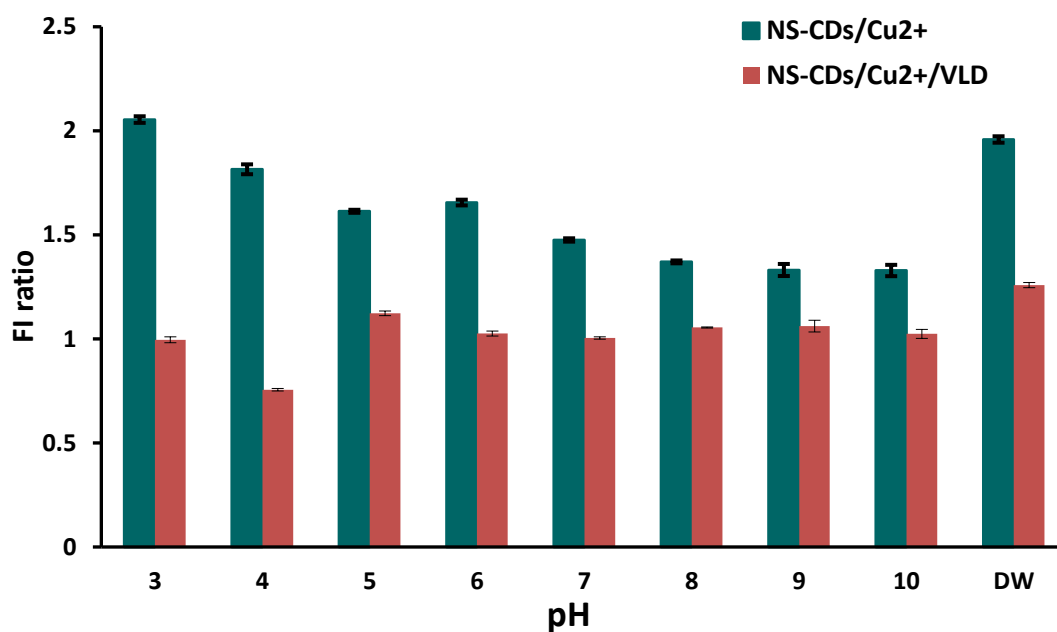

**Fig. S4:** The effect of pH on NS-CDs FL quenching by Cu<sup>2+</sup> (where FI ratio is the ratio of FI of the NS-CDs and the FI of the NS-CDs/Cu<sup>2+</sup> system) and FL recovery by VLD (where FI ratio is the ratio of FI of the NS-CDs/Cu<sup>2+</sup>/VLD and the FI of the NS-CDs/Cu<sup>2+</sup> system).

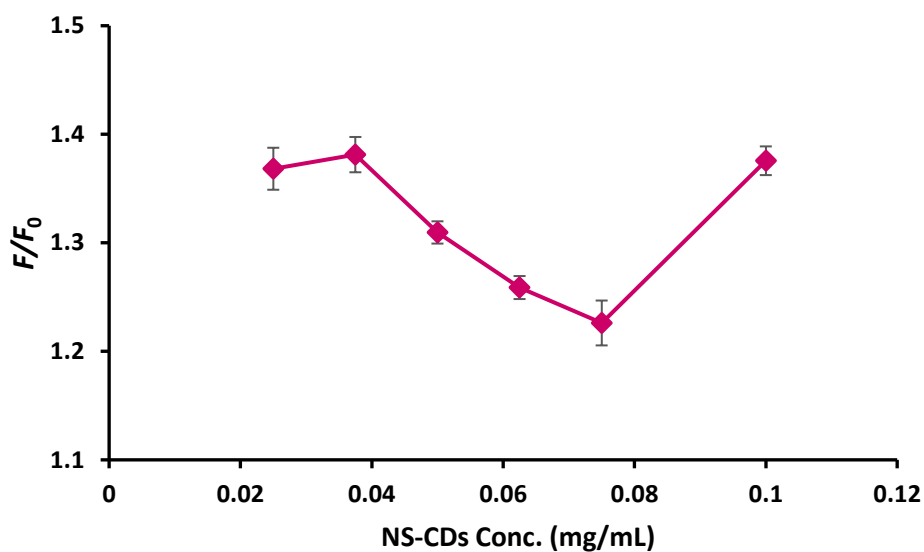

**Fig. S5:** The effect of NS-CDs concentration on VLD detection, where  $F_0$  is FI of the NS-CDs/Cu<sup>2+</sup> system and  $F$  is the FI of NS-CDs/Cu<sup>2+</sup>/VLD system.

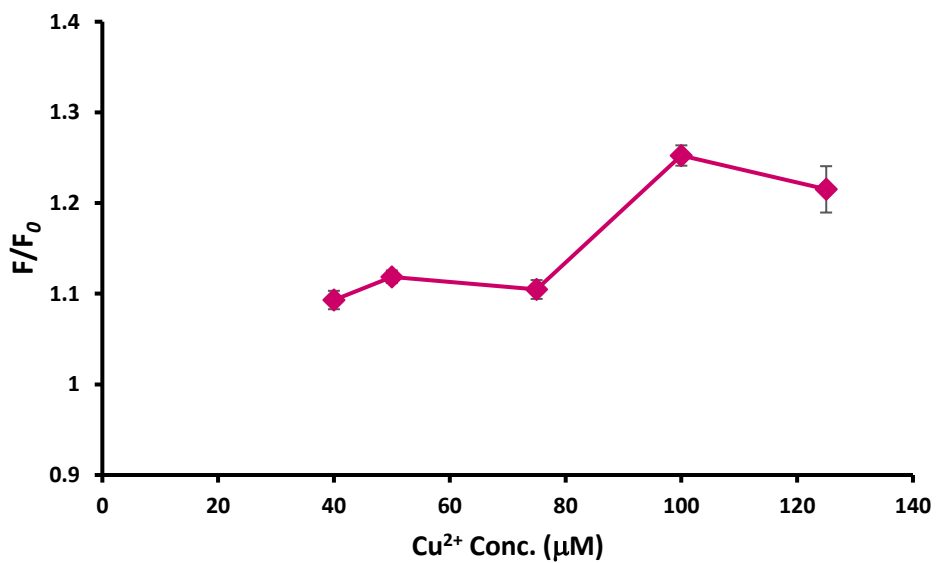

**Fig. S6:** The effect of Cu<sup>2+</sup> concentration in NS-CDs/Cu<sup>2+</sup> system on VLD detection, where  $F_0$  and  $F$  are the FI of the NS-CDs/Cu<sup>2+</sup> system and NS-CDs/Cu<sup>2+</sup>/VLD system, respectively.

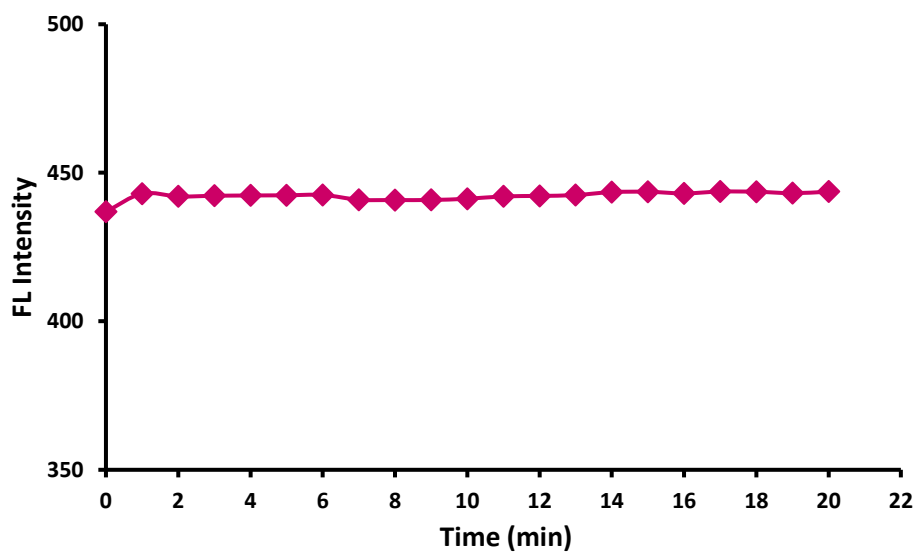

**Fig. S7:** The effect of reaction time on VLD determination by the developed NS-CDs sensor.

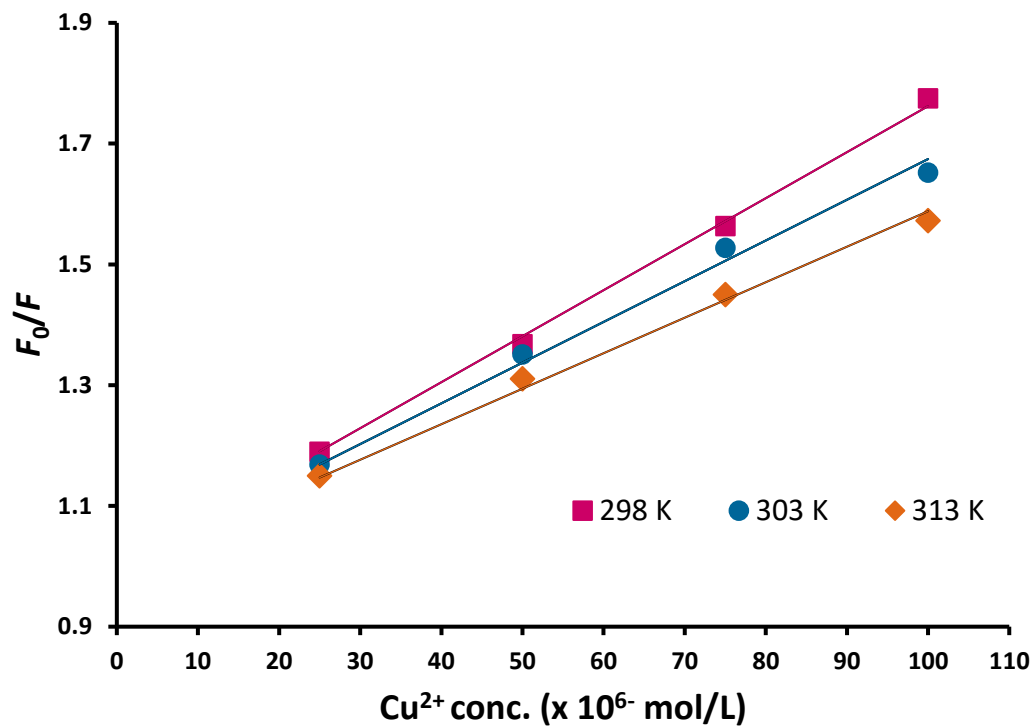

Fig. S8: Stern–Volmer plots for NS-CDs FL quenching by  $\text{Cu}^{2+}$ .

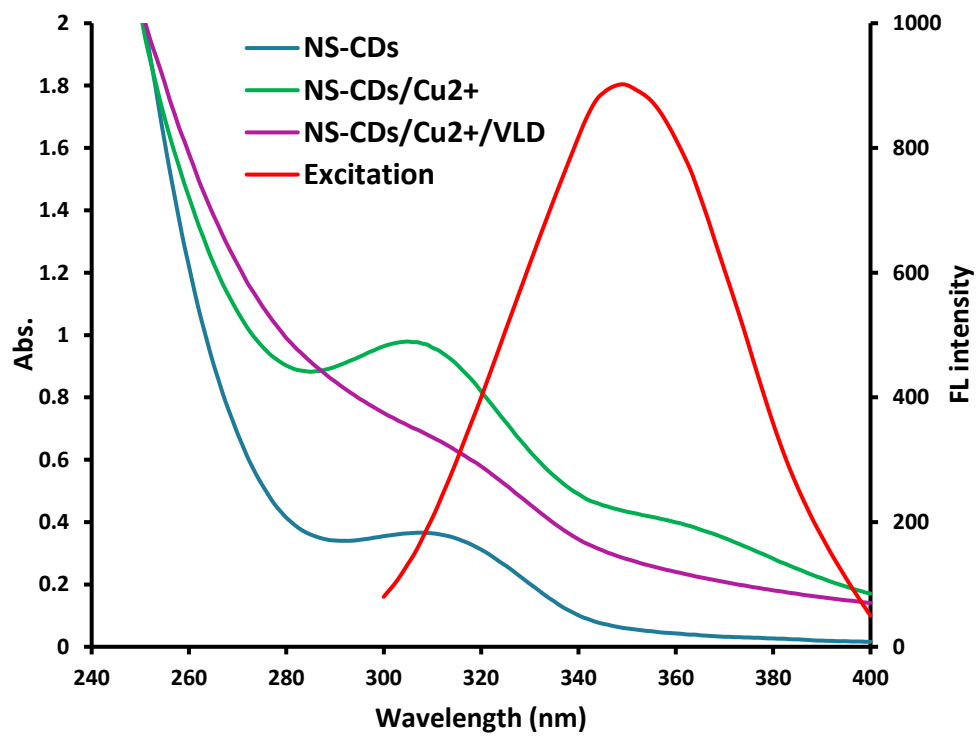

Fig. S9 Overlapping UV spectrum of NS-CDs/ $\text{Cu}^{2+}$  system with NS-CDs FL excitation and the effect of VLD addition on the system

**Table S1** Application results for the synthesized sensor for analysis of VLD in marketed tablets.

| <b>Vildagluse<sup>®</sup> tablets</b> | <b>Proposed method</b>     |                                               | <b>Comparison method <sup>11</sup></b> |
|---------------------------------------|----------------------------|-----------------------------------------------|----------------------------------------|
|                                       | <b>Conc. examined (μM)</b> | <b>Mean conc. found<sup>a</sup> (μM) ± SD</b> |                                        |
|                                       | 150.0                      | 149.3 ± 0.25                                  |                                        |
| <b>Mean % recovery ± SD</b>           |                            | 99.53 ± 0.30                                  | 99.7 ± 0.27                            |
| <b>%RSD</b>                           |                            | 0.30                                          | 0.27                                   |
| <b><i>t</i>-test</b>                  |                            | 1.27 (2.228)                                  |                                        |
| <b><i>F</i>-test</b>                  |                            | 1.18 (5.050)                                  |                                        |

<sup>a</sup> n= 6; tabulated *t* and *F* values at  $\alpha = 0.05$ .
